# Supplementary material for: Dendrite-free Zn anodes enabled by functional nitrogen-doped carbon protective layers for aqueous zinc-ion batteries
Source: Royal Society of Chemistry journal article supplement (doi:10.1039/d0dt03459b), 2020-01-01
Supplement: d0dt03459b1.pdf [file d0dt03459b1.pdf]

# Dendrite-free Zn Anodes Enabled by Functional Nitrogen-Doped Carbon Protective Layers for Aqueous Zinc-Ion Batteries

Cuiping Wu, Kaixuan Xie, Kaixin Ren, Shun Yang,\* Qinghong Wang\*

*School of Chemistry and Materials Science, Jiangsu Normal University, Xuzhou, Jiangsu 221116, P.R. China.*

*\*Corresponding author. E-mail addresses: wangqh@jsnu.edu.cn*

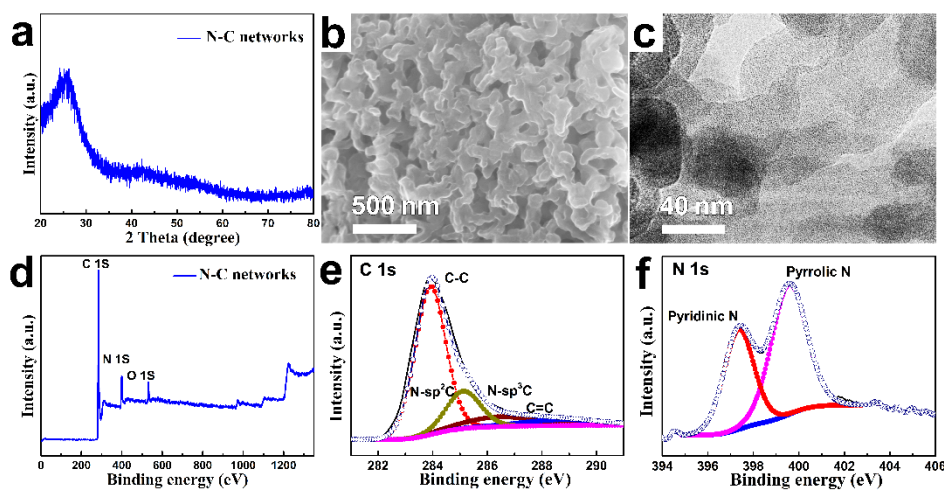

**Fig.S1** (a) XRD patterns. (b and c) SEM and HRTEM images of the N-C networks materials. (d) XPS survey spectra of the N-C networks. High-resolution (e) C 1s and (f) N 1s spectra of N-C networks.

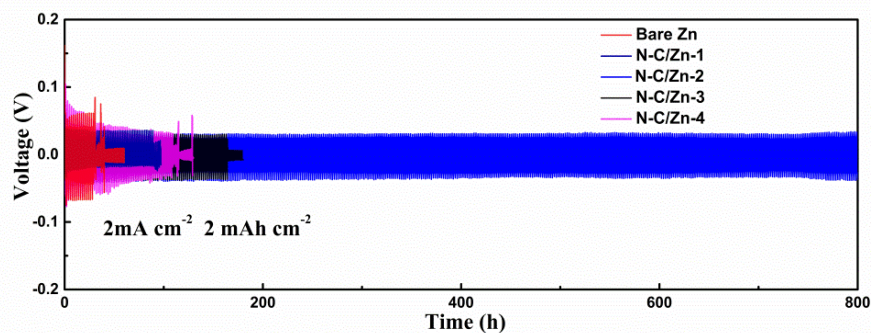

**Fig. S2** Voltage-time profiles of the N-C/Zn anodes with different coating amount at a current density of  $2 \text{ mA cm}^{-2}$  with a fixed capacity of  $2 \text{ mAh cm}^{-2}$ .

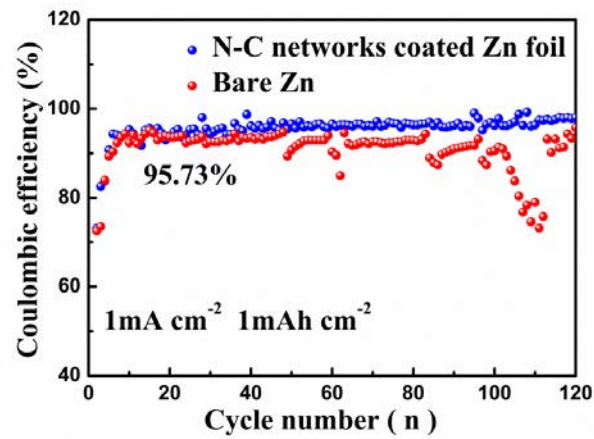

**Fig. S3** Coulombic efficiencies of Zn plating/stripping on Cu foil with/without N-C coating at 1 mA cm<sup>-2</sup>.

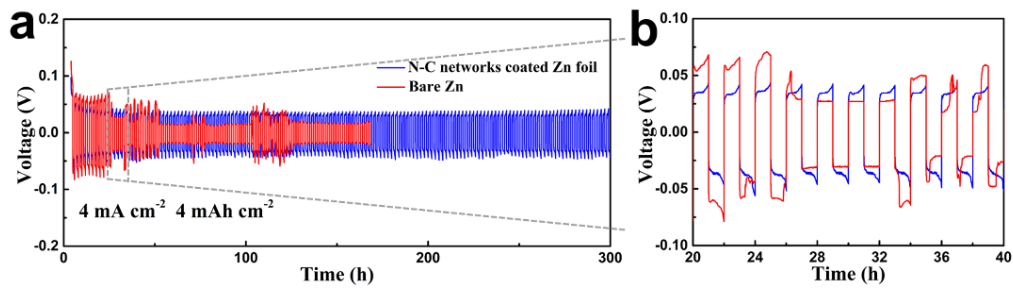

**Fig. S4** Voltage-time profiles (a and b) at a current density of 4 mA cm<sup>-2</sup> with a fixed capacity of 4 mAh cm<sup>-2</sup>.

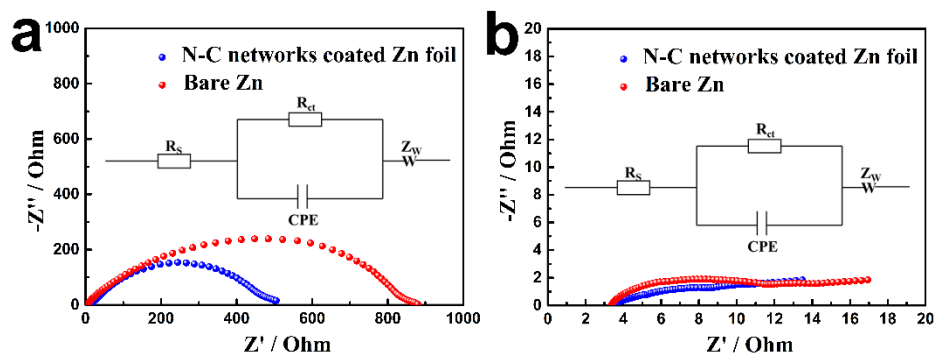

**Fig. S5** (a and b) Nyquist plots of the N-C networks coated Zn electrode before cycling and after 60 h at 1 mA cm<sup>-2</sup>. (the inset is the relevant equivalent circuit)

**Table S1** The simulated impedance results of the N-C networks coated Zn foil and bare Zn electrodes before and after 60 h at 1 mA cm<sup>-2</sup>.

| Sample                                  | N-C networks coated Zn foil | Bare Zn |
|-----------------------------------------|-----------------------------|---------|
| R <sub>ct</sub> (ohm)<br>(Before cycle) | 451.7                       | 846     |
| R <sub>ct</sub> (ohm)<br>(60th cycle)   | 7.797                       | 10.16   |

**Table S2** Comparison of the cycling performances of different coated-Zn anodes

| Coating Materials                       | Current Densities        | Capacity                   | Cycle life | Ref.      |
|-----------------------------------------|--------------------------|----------------------------|------------|-----------|
| 3D CNTs                                 | 2 mA cm <sup>-2</sup>    | 2 mAh cm <sup>-2</sup>     | 200h       | [1]       |
| Al <sub>2</sub> O <sub>3</sub> coating  | 1 mA cm <sup>-2</sup>    | 1 mAh cm <sup>-2</sup>     | 500h       | [2]       |
| TiO <sub>2</sub> layer                  | 1 mA cm <sup>-2</sup>    | 1 mAh cm <sup>-2</sup>     | 150h       | [3]       |
| Porous kaolin coating                   | 4.4 mA cm <sup>-2</sup>  | 1.1 mA h cm <sup>-2</sup>  | 800 h      | [4]       |
| Nanoporous CaCO <sub>3</sub>            | 0.25 mA cm <sup>-2</sup> | 0.05 mA h cm <sup>-2</sup> | 836 h      | [5]       |
| Reduced graphene oxide                  | 2 mA cm <sup>-2</sup>    | 2 mA h cm <sup>-2</sup>    | 200 h      | [6]       |
| Nitrogen-Doped Carbon Protective Layers | 2 mA cm <sup>-2</sup>    | 2 mAh cm <sup>-2</sup>     | 800 h      | This work |

#### References

- [1] Y. Zeng, X. Zhang, R. Qin, X. Liu, P. Fang, D. Zheng, Y. Tong and X. Lu, *Adv. Mater.*, 2019, **31**, 1903675.
- [2] H. He, H. Tong, X. Song, X. Song and J. Liu, *J. Mater. Chem. A*, 2020, **8**, 7836-7846.
- [3] K. Zhao, C. Wang, Y. Yu, M. Yan, Q. Wei, P. He, Y. Dong, Z. Zhang, X. Wang and L. Mai, *Adv. Mater. Interfaces*, 2018, **5**, 1800848.
- [4] C. Deng, X. Xie, J. Han, Y. Tang, J. Gao, C. Liu, X. Shi, J. Zhou and S. Liang, *Adv. Funct. Mater.*, 2020, **30**, 2000599.
- [5] L. Kang, M. Cui, F. Jiang, Y. Gao, H. Luo, J. Liu, W. Liang and C. Zhi, *Adv. Energy Mater.*, 2018, **8**, 1801090.
- [6] C. Shen, X. Li, N. Li, K. Xie, J.G. Wang, X.R. Liu and B. Wei, *ACS Appl. Mater. Interfaces*, 2018, **10**, 25446–25453.
